# Supplementary material for: Host Response of Human Epidermis to Methicillin-Resistant Staphylococcus aureus Biofilm Infection and Synthetic Antibiofilm Peptide Treatment
Source: MDPI journal article supplement (doi:10.3390/cells11213459), 2022-11-01
Supplement: s1 [file s1]

## Supplementary Tables

**Table S1.** Inflammatory gene expression relative to untreated control skins. RT-qPCR of thermally burned skin samples infected with MRSA biofilm with or without DJK-5 treatment. Statistical analysis comparing each condition (3–4 replicates) to untreated skin was performed using one-way ANOVA, Dunnett's multiple comparison test (\*  $p \leq 0.05$ ; \*\*  $p \leq 0.01$ ; \*\*\*  $p \leq 0.001$ ; \*\*\*\*  $p \leq 0.0001$ ).

| Gene          | Fold change in gene expression (mean $\pm$ SD) |                |                     |                            |                                    |
|---------------|------------------------------------------------|----------------|---------------------|----------------------------|------------------------------------|
|               | DJK-5 control                                  | Burned skin    | Burned skin + DJK-5 | Burned skin + MRSA biofilm | Burned skin + MRSA biofilm + DJK-5 |
| IL-8          | 1.1 $\pm$ 0.30                                 | 0.9 $\pm$ 0.28 | 1.1 $\pm$ 0.23      | 24.9 $\pm$ 2.33 ****       | 4.2 $\pm$ 3.50                     |
| IL-1 $\beta$  | 1.0 $\pm$ 0.30                                 | 1.2 $\pm$ 0.12 | 2.1 $\pm$ 0.32      | 53.7 $\pm$ 4.67 ****       | 10.8 $\pm$ 1.02 ****               |
| IL-1 $\alpha$ | 1.2 $\pm$ 0.17                                 | 1.0 $\pm$ 0.48 | 1.5 $\pm$ 0.26      | 20.3 $\pm$ 1.69 ****       | 3.8 $\pm$ 2.75 *                   |
| IL-6          | 0.7 $\pm$ 0.12                                 | 0.7 $\pm$ 0.13 | 1.0 $\pm$ 0.18      | 1.6 $\pm$ 0.26 **          | 1.3 $\pm$ 0.31                     |

**Table S2.** Human RT-qPCR Primer Sequences used in Supplementary TABLE 1.

| Gene          | Forward                  | Reverse               |
|---------------|--------------------------|-----------------------|
| IL-8          | GCCAGGAAGAAACCACCGGAAGG  | GGCTGCCAAGAGAGCCACGG  |
| IL-1 $\beta$  | ACGAATCTCCGACCACCACT     | CCATGGCCACAACAACCTGAC |
| IL-1 $\alpha$ | CGCCAATGACTCAGAGGAAGA    | AGGGCGTCATTCAGGATGAA  |
| IL-6          | GGTACATCCTCGACGGCATCT    | GTGCCTCTTTGCTGCTTTCAC |
| B2M           | GATGAGTATGCCTGCCGTGTG    | CAAACCTCGGGTAGCATCAT  |
| RPLP0         | CACCATTGAAATCCTGAGTGATGT | TGACCAGCCCAAGGAGAAG   |

**Table S3.** DJK-5 Suppressed Inflammatory Cytokine and Chemokine Production from MRSA Biofilm Infected Burned Skin. ELISA of MRSA biofilm infected burned skin samples with or without DJK-5 treatment. Statistical analysis comparing DJK-5 treated biofilm to MRSA biofilm infected skin (15–18 replicates) was performed using unpaired t-test (\*  $p \leq 0.05$ ; \*\*  $p \leq 0.01$ ; \*\*\*  $p \leq 0.001$ ; \*\*\*\*  $p \leq 0.0001$ ).

| Cytokine     | Cytokine levels quantified from skin culture medium (mean $\pm$ SD) |                                            |                             |
|--------------|---------------------------------------------------------------------|--------------------------------------------|-----------------------------|
|              | Burned skin + MRSA biofilm (pg/mL)                                  | Burned skin + MRSA biofilm + DJK-5 (pg/mL) | Burned skin control (pg/mL) |
| IL-8         | 3796.2 $\pm$ 1368.9                                                 | 1437.6 $\pm$ 897.7 ****                    | 472.9 $\pm$ 158.1           |
| IL-1 $\beta$ | 665.5 $\pm$ 216.3                                                   | 77.2 $\pm$ 33.8 ****                       | 2.0 $\pm$ 1.7               |

**Table S4.** Differential Gene Expression of Representative Genes in Different Biological Functions in RNA-Seq Analysis.

| Function               | Comparison | Burned skin + MRSA biofilm vs. Burn skin |             |                        | Burned skin + MRSA biofilm + DJK-5 vs. Burned skin + MRSA biofilm |                        |
|------------------------|------------|------------------------------------------|-------------|------------------------|-------------------------------------------------------------------|------------------------|
|                        |            | Gene                                     | Fold change | Adjusted p-value       | Fold change                                                       | Adjusted p-value       |
| Inflammatory cytokines |            | IL-17C                                   | 803.80      | $2.62 \times 10^{-12}$ | -24.0                                                             | $2.16 \times 10^{-4}$  |
|                        |            | IL-23A                                   | 68.30       | $6.42 \times 10^{-14}$ | -6.2                                                              | $1.47 \times 10^{-3}$  |
| Keratins               |            | KRT1                                     | -4.95       | $5.13 \times 10^{-6}$  | 3.67                                                              | $2.58 \times 10^{-4}$  |
|                        |            | KRT2                                     | -18.43      | $2.73 \times 10^{-9}$  | 9.23                                                              | $7.77 \times 10^{-6}$  |
|                        |            | KRT9                                     | -5.36       | $5.22 \times 10^{-11}$ | 2.50                                                              | $5.83 \times 10^{-4}$  |
|                        |            | KRT10                                    | -8.63       | $3.09 \times 10^{-8}$  | 5.48                                                              | $1.65 \times 10^{-5}$  |
| ECM proteins           |            | LAMA1                                    | 5.97        | $4.45 \times 10^{-31}$ | -3.75                                                             | $2.48 \times 10^{-17}$ |
|                        |            | LAMA3                                    | 5.70        | $6.67 \times 10^{-18}$ | -3.15                                                             | $2.11 \times 10^{-8}$  |
|                        |            | ITGA2                                    | 7.22        | $3.16 \times 10^{-18}$ | -3.48                                                             | $6.35 \times 10^{-8}$  |
|                        |            | ITGA5                                    | 14.31       | $2.22 \times 10^{-32}$ | -7.41                                                             | $1.08 \times 10^{-18}$ |
|                        |            | ITGB4                                    | 6.60        | $1.01 \times 10^{-36}$ | -5.00                                                             | $7.89 \times 10^{-27}$ |
|                        |            | MMP1                                     | 3.90        | $3.92 \times 10^{-8}$  | -1.74                                                             | $3.05 \times 10^{-2}$  |
|                        |            | MMP3                                     | 12.63       | $1.05 \times 10^{-14}$ | -11.05                                                            | $4.85 \times 10^{-13}$ |
|                        |            | MMP9                                     | 5.01        | $1.04 \times 10^{-10}$ | -2.70                                                             | $9.61 \times 10^{-5}$  |

|            |       |       |                        |      |                        |
|------------|-------|-------|------------------------|------|------------------------|
| DNA repair | BRCA1 | -2.55 | $4.12 \times 10^{-5}$  | 3.11 | $8.43 \times 10^{-7}$  |
|            | BRCA2 | -4.93 | $2.71 \times 10^{-5}$  | 7.12 | $2.75 \times 10^{-7}$  |
|            | RFC2  | -2.71 | $1.11 \times 10^{-14}$ | 2.56 | $6.34 \times 10^{-13}$ |
|            | RFC3  | -2.49 | $6.30 \times 10^{-5}$  | 3.56 | $2.74 \times 10^{-8}$  |

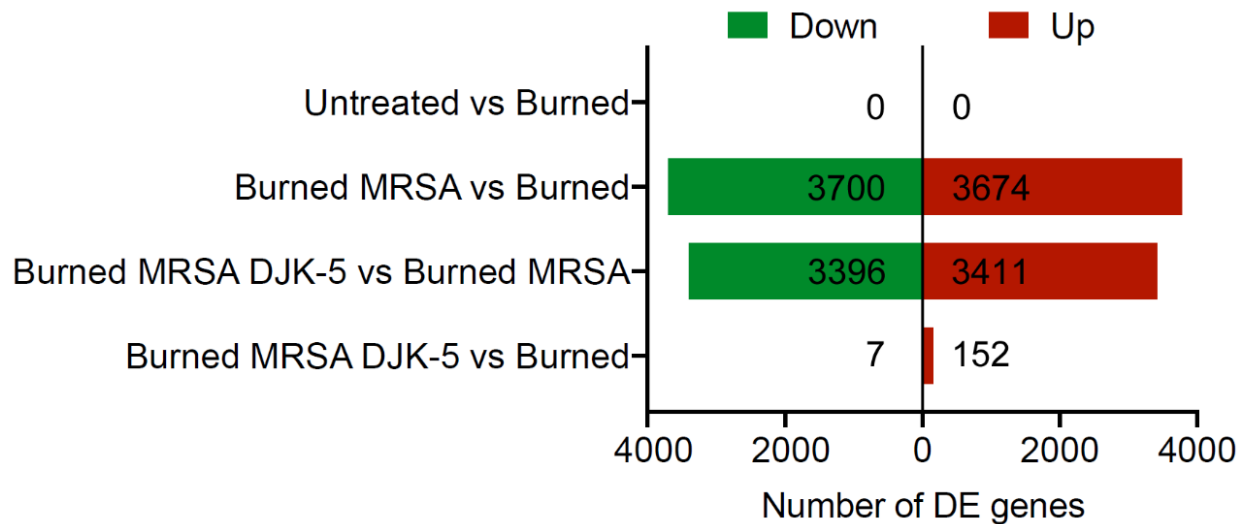

**Figure S1.** Differential expression analysis of MRSA biofilm infected thermally-injured skin treated with topical DJK-5. One-day MRSA USA300-LAC skin biofilms associated with thermally-damaged N/TERT epidermal skin were treated with vehicle control (water) or DJK-5 peptide at a dosage of 0.4% (120  $\mu$ g) for 24 h. RNA-Seq libraries were sequenced on a HiSeqX sequencer (Illumina). Differential expression analysis was performed using DESeq2 v1.28.1, and significance was determined based on adjusted p-value  $\leq 0.05$  and fold change  $\geq \pm 1.5$ .
